# Supplementary material
Source: publisher figshare collection journal article supplement (https://tandf.figshare.com/ndownloader/files/17136452)
Supplement: Supplementary file 1 [file 17136452]

## **Supplemental File A**

Demographic profiles of households, disaggregated by spouses' reported decision-making patterns, were generated via canonical discriminant analysis (Johnson and Wichern 2002) using the candisc package of R (RStudio Team 2016). For the three CSA practices (i.e. seed selection, fallow and intercropping), disagreement on decision making was not strongly associated with any of the demographics factors. For two out of the three CSA practices (seed selection and fallow), joint decision making was most strongly associated with total land holding, and to a lesser extent household size. For the consumption decisions, joint decision making was not strongly associated with any of the demographics factors. For decisions regarding food costs, individual male decision making was more strongly associated with few years of female education. Regarding decisions on child expenses, individual female decision making was more strongly associated with few years of female education. Major household purchases did not show any clearly discernible associations with any of the demographics factors.

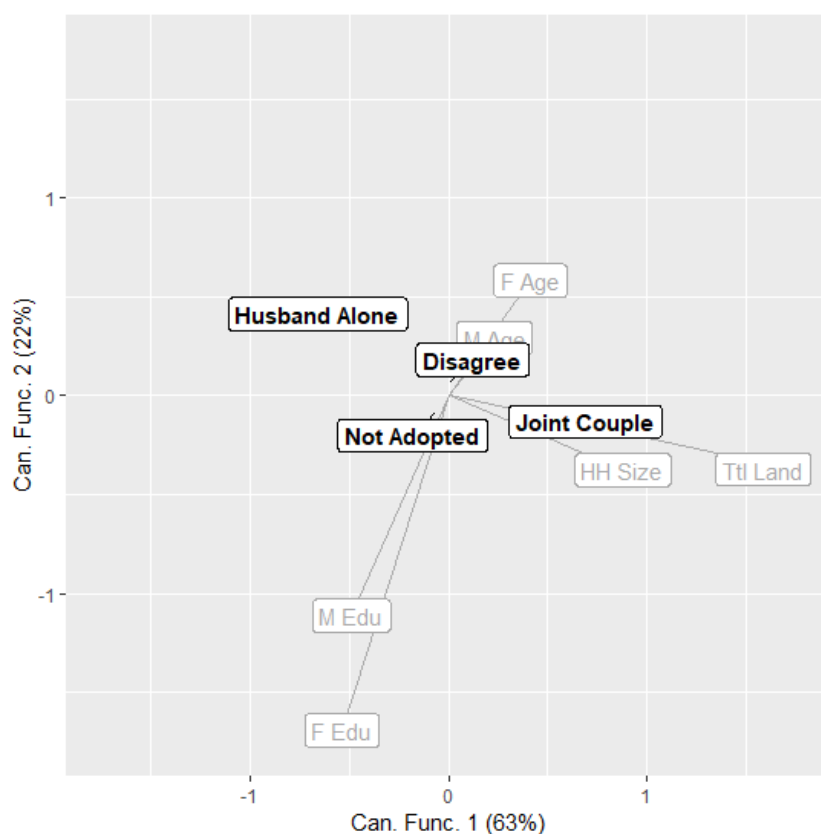

Figure 1A Canonical Discriminant Analysis: demographics and decision making for the adoption of seed selection

Table 1A Canonical Discriminant Analysis: demographics and decision making for the adoption of seed selection

| Canonical Variate                  | Squared Canonical Correlations | Eigen Value        | Difference         | Percent | Cumulative |
|------------------------------------|--------------------------------|--------------------|--------------------|---------|------------|
| Canonical 1                        | 0,022                          | 0,022              | 0,014              | 63,381  | 63,381     |
| Canonical 2                        | 0,008                          | 0,008              | 0,014              | 22,436  | 85,817     |
| Canonical 3                        | 0,005                          | 0,005              | 0,014              | 14,183  | 100,000    |
| <b>Class means</b>                 | <b>Canonical 1</b>             | <b>Canonical 2</b> | <b>Canonical 3</b> |         |            |
| Disagree                           | 0,014                          | 0,075              | 0,030              |         |            |
| Joint Couple                       | 0,618                          | -0,060             | -0,135             |         |            |
| Not Adopted                        | -0,072                         | -0,093             | -0,011             |         |            |
| Male Alone                         | -0,657                         | 0,411              | -0,753             |         |            |
| <b>Standard coefficients</b>       | <b>Canonical 1</b>             | <b>Canonical 2</b> | <b>Canonical 3</b> |         |            |
| Age of Female Spouse (years)       | 0,297                          | 0,793              | 0,617              |         |            |
| Age of Male Spouse (years)         | -0,505                         | -0,395             | -1,059             |         |            |
| Education Female Spouse (years)    | -0,242                         | -0,832             | 0,419              |         |            |
| Education Male Spouse (years)      | -0,035                         | -0,031             | -0,687             |         |            |
| Total Area of Land (acres)         | 0,856                          | -0,233             | -0,413             |         |            |
| Household Size (number of members) | 0,407                          | -0,328             | 0,692              |         |            |

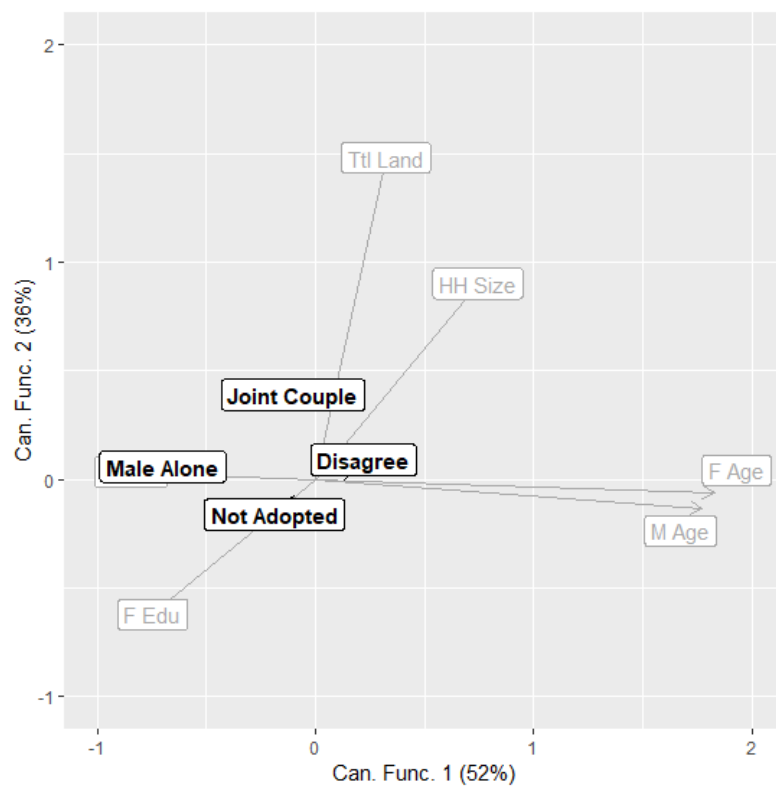

Figure 2A Canonical Discriminant Analysis: demographics and decision making for the adoption of fallow

Table 2A Canonical Discriminant Analysis: demographics and decision making for the adoption of fallow

| Canonical Variate                  | Squared Canonical Correlations | Eigen Value        | Difference         | Percent | Cumulative |
|------------------------------------|--------------------------------|--------------------|--------------------|---------|------------|
| Canonical 1                        | 0,020                          | 0,021              | 0,006              | 51,569  | 51,569     |
| Canonical 2                        | 0,015                          | 0,015              | 0,006              | 36,320  | 87,888     |
| Canonical 3                        | 0,005                          | 0,005              | 0,006              | 12,112  | 100,000    |
| <b>Class means</b>                 | <b>Canonical 1</b>             | <b>Canonical 2</b> | <b>Canonical 3</b> |         |            |
| Disagree                           | 0,133                          | 0,001              | -0,036             |         |            |
| Joint Couple                       | -0,102                         | 0,389              | 0,051              |         |            |
| Not Adopted                        | -0,101                         | -0,075             | 0,047              |         |            |
| Male Alone                         | -0,651                         | 0,010              | -0,428             |         |            |
| <b>Standard coefficients</b>       | <b>Canonical 1</b>             | <b>Canonical 2</b> | <b>Canonical 3</b> |         |            |
| Age of Female Spouse (years)       | 0,582                          | 0,045              | 0,504              |         |            |
| Age of Male Spouse (years)         | 0,373                          | -0,454             | -0,282             |         |            |
| Education Female Spouse (years)    | -0,283                         | -0,504             | 0,920              |         |            |
| Education Male Spouse (years)      | -0,116                         | 0,342              | -0,246             |         |            |
| Total Area of Land (acres)         | -0,044                         | 0,777              | 0,465              |         |            |
| Household Size (number of members) | -0,023                         | 0,523              | -0,130             |         |            |

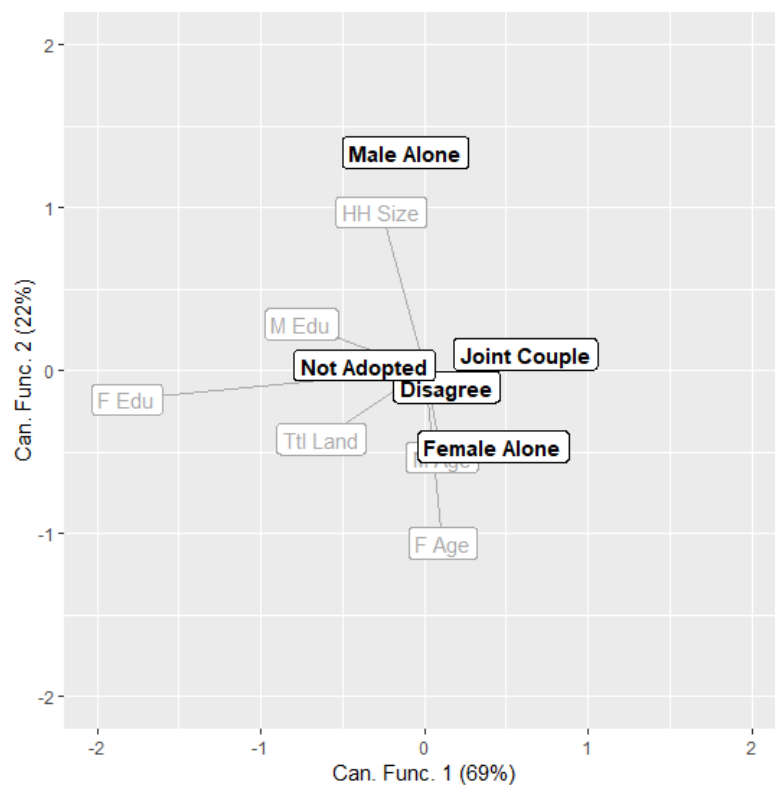

Figure 3A Canonical Discriminant Analysis: demographics and decision making for the adoption of intercropping

Table 3A Canonical Discriminant Analysis: demographics and decision making for the adoption of intercropping

| Canonical Variate                  | Squared Canonical Correlations | Eigen Value        | Difference         | Percent | Cumulative |
|------------------------------------|--------------------------------|--------------------|--------------------|---------|------------|
| Canonical 1                        | 0,048                          | 0,051              | 0,034              | 69,272  | 69,272     |
| Canonical 2                        | 0,016                          | 0,017              | 0,034              | 22,479  | 91,752     |
| Canonical 3                        | 0,005                          | 0,005              | 0,034              | 6,258   | 98,009     |
| Canonical 4                        | 0,001                          | 0,001              | 0,034              | 1,991   | 100,000    |
| <b>Class means</b>                 | <b>Canonical 1</b>             | <b>Canonical 2</b> | <b>Canonical 3</b> |         |            |
| Disagree                           | -0,015                         | -0,016             | 0,030              |         |            |
| Joint Couple                       | 0,518                          | 0,019              | -0,003             |         |            |
| Not Adopted                        | -0,193                         | -0,011             | -0,029             |         |            |
| Sole Male Spouse                   | -0,116                         | 1,339              | -0,147             |         |            |
| Sole Female Spouse                 | 0,421                          | -0,466             | -0,924             |         |            |
| <b>Standard coefficients</b>       | <b>Canonical 1</b>             | <b>Canonical 2</b> | <b>Canonical 3</b> |         |            |
| Age of Female Spouse (Years)       | 0,177                          | -1,363             | -0,413             |         |            |
| Age of Male Spouse (Years)         | 0,044                          | 0,637              | 1,012              |         |            |
| Education Female Spouse (Years)    | -1,044                         | -0,147             | 0,301              |         |            |
| Education Male Spouse (Years)      | 0,228                          | 0,108              | -0,632             |         |            |
| Total Area of Land (acres)         | -0,335                         | -0,167             | -0,148             |         |            |
| Household Size (number of members) | -0,188                         | 0,799              | 0,280              |         |            |

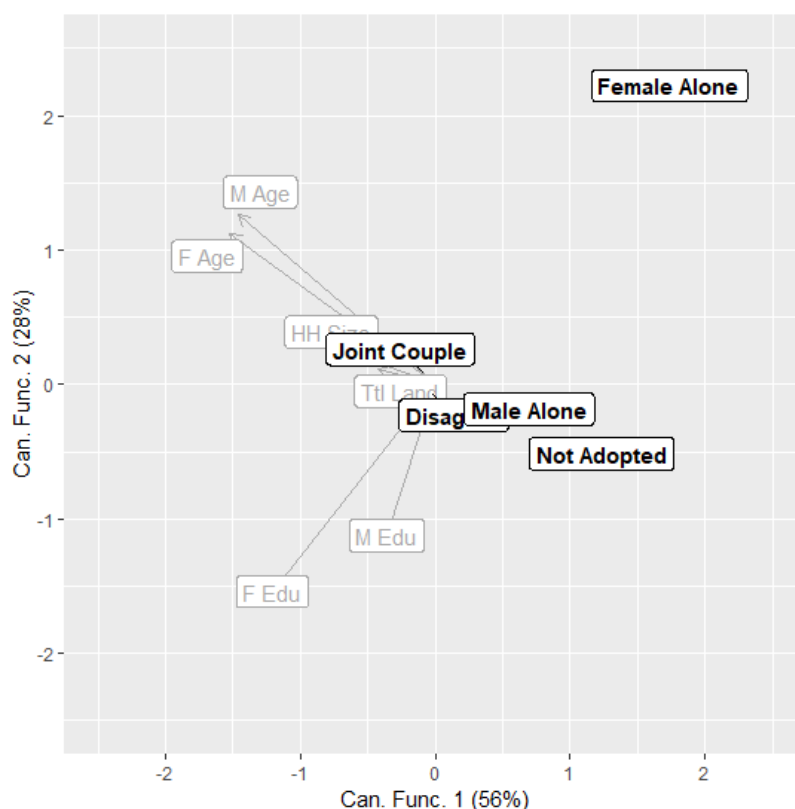

Figure 4A Canonical Discriminant Analysis: demographics and decision making for decisions on expenses for children

Table 4A Canonical Discriminant Analysis: demographics and decision making for decisions on expenses for children

| Canonical Variate                  | Squared Canonical Correlations | Eigen Value        | Difference         | Percent | Cumulative |
|------------------------------------|--------------------------------|--------------------|--------------------|---------|------------|
| Canonical 1                        | 0,035                          | 0,037              | 0,018              | 55,829  | 55,829     |
| Canonical 2                        | 0,018                          | 0,019              | 0,018              | 28,316  | 84,145     |
| Canonical 3                        | 0,009                          | 0,010              | 0,018              | 14,604  | 98,749     |
| Canonical 4                        | 0,001                          | 0,001              | 0,018              | 1,251   | 100,000    |
| <b>Class means</b>                 | <b>Canonical 1</b>             | <b>Canonical 2</b> | <b>Canonical 3</b> |         |            |
| Disagree                           | -0,015                         | -0,075             | -0,041             |         |            |
| Joint Couple                       | -0,095                         | 0,096              | 0,029              |         |            |
| None                               | 1,228                          | -0,510             | -1,520             |         |            |
| Sole Male Spouse                   | 0,553                          | -0,088             | 0,178              |         |            |
| Sole Female Spouse                 | 1,740                          | 2,224              | -0,683             |         |            |
| <b>Standard coefficients</b>       | <b>Canonical 1</b>             | <b>Canonical 2</b> | <b>Canonical 3</b> |         |            |
| Age of Female Spouse (Years)       | -0,487                         | 0,071              | -1,079             |         |            |
| Age of Male Spouse (Years)         | -0,322                         | 0,628              | 0,749              |         |            |
| Education Female Spouse (Years)    | -0,676                         | -0,712             | -0,096             |         |            |
| Education Male Spouse (Years)      | 0,078                          | -0,066             | 0,096              |         |            |
| Total Area of Land (acres)         | -0,053                         | -0,075             | 0,199              |         |            |
| Household Size (number of members) | 0,027                          | -0,189             | 0,911              |         |            |

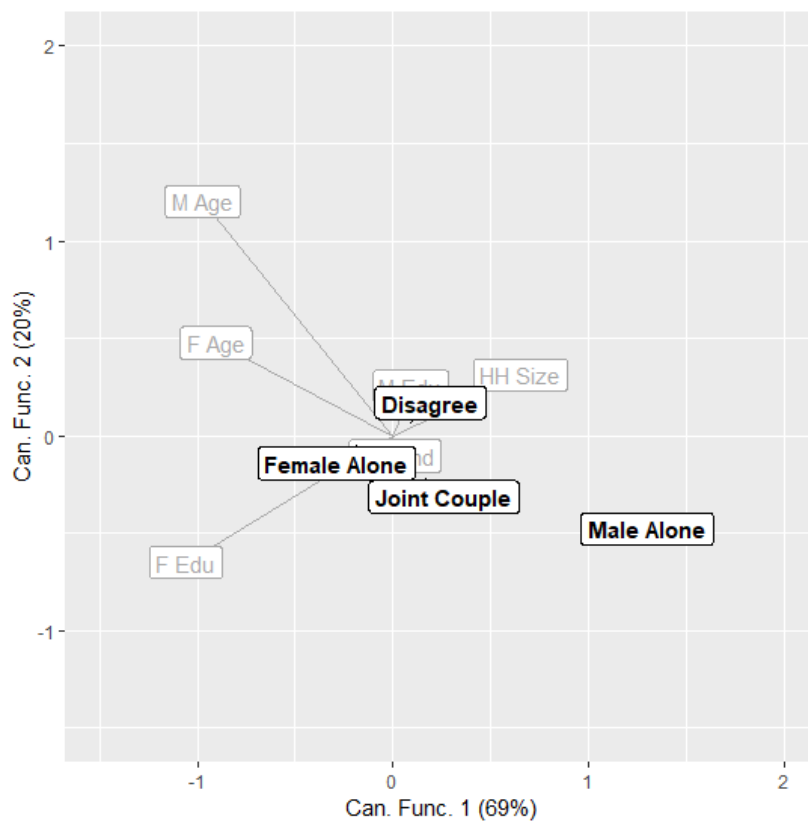

Figure 5A Canonical Discriminant Analysis: demographics and decision making for decisions on budget for food costs

Table 5A Canonical Discriminant Analysis: demographics and decision making for decisions on budget for food costs

| Canonical Variate                  | Squared Canonical Correlations | Eigen Value        | Difference         | Percent | Cumulative |
|------------------------------------|--------------------------------|--------------------|--------------------|---------|------------|
| Canonical 1                        | 0,030                          | 0,031              | 0,022              | 69,006  | 69,006     |
| Canonical 2                        | 0,009                          | 0,009              | 0,022              | 19,500  | 88,506     |
| Canonical 3                        | 0,005                          | 0,005              | 0,022              | 11,494  | 100,000    |
| <b>Class means</b>                 | <b>Canonical 1</b>             | <b>Canonical 2</b> | <b>Canonical 3</b> |         |            |
| Disagree                           | 0,092                          | 0,070              | -0,009             |         |            |
| Joint Couple                       | 0,169                          | -0,222             | -0,168             |         |            |
| Sole Male Spouse                   | 1,302                          | -0,479             | 0,621              |         |            |
| Sole Female Spouse                 | -0,187                         | -0,047             | 0,036              |         |            |
| <b>Standard coefficients</b>       | <b>Canonical 1</b>             | <b>Canonical 2</b> | <b>Canonical 3</b> |         |            |
| Age of Female Spouse (Years)       | -0,111                         | -1,093             | -1,123             |         |            |
| Age of Male Spouse (Years)         | -0,638                         | 1,668              | 0,644              |         |            |
| Education Female Spouse (Years)    | -0,809                         | -0,592             | 0,584              |         |            |
| Education Male Spouse (Years)      | 0,460                          | 0,511              | -0,112             |         |            |
| Total Area of Land (acres)         | 0,103                          | -0,125             | -0,528             |         |            |
| Household Size (number of members) | 0,621                          | -0,084             | 0,399              |         |            |

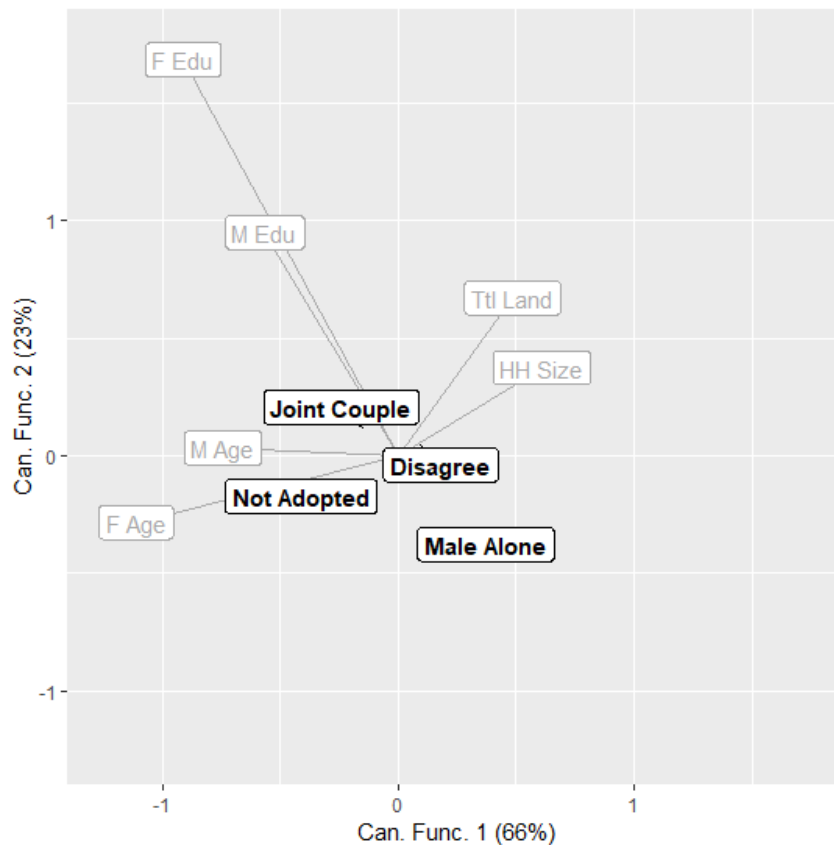

Figure 6A Canonical Discriminant Analysis: demographics and decision making for decisions on purchases of major household items

Table 6A Canonical Discriminant Analysis: demographics and decision making for decisions on purchases of major household items

| Canonical Variate                  | Squared Canonical Correlations | Eigen Value        | Difference         | Percent | Cumulative |
|------------------------------------|--------------------------------|--------------------|--------------------|---------|------------|
| Canonical 1                        | 0,038                          | 0,040              | 0,026              | 66,116  | 66,116     |
| Canonical 2                        | 0,014                          | 0,014              | 0,026              | 22,932  | 89,048     |
| Canonical 3                        | 0,007                          | 0,007              | 0,026              | 10,952  | 100,000    |
| <b>Class means</b>                 | <b>Canonical 1</b>             | <b>Canonical 2</b> | <b>Canonical 3</b> |         |            |
| Disagree                           | 0,094                          | 0,048              | 0,032              |         |            |
| Joint Couple                       | -0,154                         | 0,121              | -0,217             |         |            |
| None                               | -0,347                         | -0,109             | 0,042              |         |            |
| Sole Male Spouse                   | 0,372                          | -0,377             | -0,114             |         |            |
| <b>Standard coefficients</b>       | <b>Canonical 1</b>             | <b>Canonical 2</b> | <b>Canonical 3</b> |         |            |
| Age of Female Spouse (Years)       | -1,162                         | -0,776             | -0,521             |         |            |
| Age of Male Spouse (Years)         | 0,288                          | 0,548              | 0,374              |         |            |
| Education Female Spouse (Years)    | -0,358                         | 0,876              | 0,047              |         |            |
| Education Male Spouse (Years)      | -0,184                         | -0,047             | 0,189              |         |            |
| Total Area of Land (acres)         | 0,322                          | 0,356              | -0,869             |         |            |
| Household Size (number of members) | 0,600                          | 0,238              | 0,440              |         |            |
